# Supplementary material
Source: ML conference proceedings conference paper supplement (https://proceedings.mlr.press/v139/poklukar21a.html)
Supplement: Supplementary file 1 [file poklukar21a-supp.zip]

Archive with 2 entries (2 files):
- github_link.txt
- supp.pdf
