# Supplementary material
Source: ML conference proceedings conference paper supplement (https://proceedings.mlr.press/v139/poklukar21a.html)
Supplement: Supplementary file 1 [file poklukar21a-supp.zip › github_link.txt]

https://github.com/petrapoklukar/GeomCA
